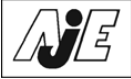

## Original Contribution

# Effect Modification of the Association of Cumulative Exposure and Cancer Risk by Intensity of Exposure and Time Since Exposure Cessation: A Flexible Method Applied to Cigarette Smoking and Lung Cancer in the SYNERGY Study

Jelle Vlaanderen\*, Lützen Portengen, Joachim Schüz, Ann Olsson, Beate Pesch, Benjamin Kendzia, Isabelle Stücker, Florence Guida, Irene Brüske, Heinz-Erich Wichmann, Dario Consonni, Maria Teresa Landi, Neil Caporaso, Jack Siemiatycki, Franco Merletti, Dario Mirabelli, Lorenzo Richiardi, Per Gustavsson, Nils Plato, Karl-Heinz Jöckel, Wolfgang Ahrens, Hermann Pohlabein, Adonina Tardón, David Zaridze, John K. Field, Andrea 't Mannetje, Neil Pearce, John McLaughlin, Paul Demers, Neonila Szeszenia-Dabrowska, Jolanta Lissowska, Peter Rudnai, Eleonora Fabianova, Rodica Stanescu Dumitru, Vladimir Bencko, Lenka Foretova, Vladimir Janout, Paolo Boffetta, Francesco Forastiere, Bas Bueno-de-Mesquita, Susan Peters, Thomas Brüning, Hans Kromhout, Kurt Straif, and Roel Vermeulen

\* Correspondence to Dr. Jelle Vlaanderen, Universiteit Utrecht, Institute for Risk Assessment Sciences, P.O. Box 80178, 3508 TD Utrecht, The Netherlands (e-mail: j.j.vlaanderen@uu.nl).

Initially submitted February 11, 2013; accepted for publication August 15, 2013.

The indiscriminate use of the cumulative exposure metric (the product of intensity and duration of exposure) might bias reported associations between exposure to hazardous agents and cancer risk. To assess the independent effects of duration and intensity of exposure on cancer risk, we explored effect modification of the association of cumulative exposure and cancer risk by intensity of exposure. We applied a flexible excess odds ratio model that is linear in cumulative exposure but potentially nonlinear in intensity of exposure to 15 case-control studies of cigarette smoking and lung cancer (1985–2009). Our model accommodated modification of the excess odds ratio per pack-year of cigarette smoking by time since smoking cessation among former smokers. We observed negative effect modification of the association of pack-years of cigarette smoking and lung cancer by intensity of cigarette smoke for persons who smoked more than 20–30 cigarettes per day. Patterns of effect modification were similar across individual studies and across major lung cancer subtypes. We observed strong negative effect modification by time since smoking cessation. Application of our method in this example of cigarette smoking and lung cancer demonstrated that reducing a complex exposure history to a metric such as cumulative exposure is too restrictive.

cigarette smoke; cumulative exposure; effect modification; lung cancer; pooled analysis

Abbreviations: EOR, excess odds ratio; ICS, lifetime average intensity of cigarette smoking; PCS, pack-years of cigarette smoking; TSC, time since smoking cessation.

*Editor's note:* An invited commentary on this article appears on page 299.

Cumulative exposure (the product of average daily exposure intensity and duration of exposure) is often the default

exposure metric used in epidemiologic cancer studies. However, the assumptions on which the use of cumulative exposure is based, namely that the cumulative probability of developing a disease is proportional to the sum of the daily probabilities of developing a disease, the daily probability of developing a disease increases monotonically with the

concentration in the target tissue, the concentration in the target tissue is linearly related to the external exposure (1), are not always justified.

Pack-years of cigarette smoking (PCS) are calculated as the average number of packs of cigarettes smoked per day multiplied by the cumulative number of years during which a person smoked. This example of the cumulative exposure metric is often used to evaluate smoking behavior in epidemiologic analyses. There is considerable evidence that with a straightforward inclusion of PCS in epidemiologic analyses of chronic health effects, not all intensity- and duration-related aspects of smoking behavior are optimally characterized (2). For example, Doll and Peto (3) demonstrated that the absolute excess rate of lung cancer among smokers was related to at least the fourth power of smoking duration and only to the second power of smoking intensity. Because both smoking duration and baseline lung cancer rates vary with age, the relationships between the excess relative risk and duration and intensity of smoking are likely to be more complex.

One way to assess the independent effects of duration and intensity of cigarette smoking on lung cancer risk is to explore effect modification of the association between PCS and lung cancer by intensity of cigarette smoking (4). Excess relative risk or excess odds ratio (EOR) models that are linear in total exposure and exponential in the intensity of exposure have been applied successfully to explore effect modification of cumulative exposure by intensity of exposure for a number of exposures (4–10). Such models have a general form of  $OR(d) = 1 + \beta_1 d \times \exp(\beta_2 (n))$ , where  $\beta_1$  represents the EOR per unit of total exposure ( $d$ ) (i.e., the EOR of disease changes in an additive fashion with total exposure) and  $\beta_2$  represents the (multiplicative) modifying effect of intensity of exposure ( $n$ ). In the past, fitting these models required the use of specialized software, but they can now be fitted in standard software packages with relative ease (11).

We explored the modification of the effect of PCS on the EOR for lung cancer by lifetime average intensity of cigarette smoking (ICS). For our analysis, we modified a previously developed approach to model total exposure and exposure intensity (4). Our analysis is unique in that we were able to apply this model in a large data set of 15 independently designed case-control studies with detailed smoking information (the SYNERGY pooling project, a pooled analysis of case-control studies on the joint effects of occupational carcinogens in the development of lung cancer) (12–14). Furthermore, our approach differs from previous applications by including a direct assessment of the modification of the EOR per PCS by the time since smoking cessation (TSC), which is a strong predictor of lung cancer risk in former smokers (15), in the regression model, and we included a 3-knot restricted cubic spline function for both ICS and TSC to allow a more flexible assessment of the shape of the modification of the EOR per PCS.

## METHODS

### SYNERGY data set

We used data from the SYNERGY project (12–14). Our data set included data from 14 case-control studies from

Canada ( $n = 2$ ), France ( $n = 3$ ), Germany ( $n = 2$ ), Italy ( $n = 3$ ), New Zealand ( $n = 1$ ), Spain ( $n = 1$ ), Sweden ( $n = 1$ ), and The Netherlands ( $n = 1$ ), as well as a multicenter study conducted in Central and Eastern Europe and the United Kingdom (16). Controls were individually or frequency-matched to cases by sex and age and recruited from the general population (82%) or hospitals (18%). Smoking information was predominantly collected through interviews with the subjects themselves (92% of cases, 94% of controls). Lung cancer subtypes were classified according to World Health Organization guidelines by the pathologists associated with the participating hospitals. The ethics committees of the individual studies approved the conduct of the study, as did the institutional review board at the International Agency for Research on Cancer. We provide an overview of the characteristics of the studies included in the analysis in Web Table 1, available at <http://aje.oxfordjournals.org/>.

### Smoking data

Information on cigarette smoking history included the number of cigarettes smoked per day in calendar-year periods and the age at smoking cessation for former smokers. We calculated continuous variables for duration of smoking, ICS, and PCS based on the smoking history. A current smoker was defined as someone who had smoked for more than 1 year and still smoked in the year of interview or in the year before. Former smokers were defined as persons who had smoked for at least 1 year but quit smoking at least 2 years before the date of the interview. Subjects who had smoked for less than 1 year were considered occasional smokers and were treated as never smokers in the analyses. All cases and controls for whom we had complete smoking data were included, without restriction on age or smoking status.

### Statistical analysis

The model we used in this article provides a balance between parsimony and model fit. The model falls within a more general framework for flexible modeling of exposure-time relations (17). Similar inferences were obtained using other model specifications within the more general framework (Web Appendix, Web Table 2, and Web Figure 1).

Below we provide a description of the models that we applied in our study, with an emphasis on how they differed from the models used in the previously published study by Lubin and Caporaso (4). Our models are linear for PCS and exponential for ICS and TSC to force the modifying effect to be non-negative. We used 2 approaches to model ICS (expressed as cigarettes smoked per day). The first approach defines  $I$  intensity categories and indicator variables,  $n_i$   $i = 1, \dots, I$ , where  $n_i = 1$  if a subject's intensity level occurs within the  $i$ th category and  $n_i = 0$  otherwise.

The model is as follows:

$$OR(d) = 1 + \beta d \times \exp\{\sum \theta_i n_i\}, \quad (A)$$

where  $\beta$  represents the EOR for each PCS,  $d$ . The model specifies a different slope for each intensity category. With  $\theta_1$  set to 0 for identifiability,  $\theta_2, \dots, \theta_I$  represent category-specific

effects relative to the  $I = 1$  level. Model A has been published before (4, 7, 8) and was fitted to a subset of the data that is restricted to current and never smokers 50–75 years of age to parallel the data sets used in previous publications.

We extended model A with a function for TSC to allow the inclusion of former smokers in our analysis, as follows:

$$\text{OR}(d) = 1 + \beta d \times \exp[g_1(t)] \times \exp\{\sum \theta_i n_i\}, \quad (\text{B})$$

where  $g_1(t)$  is a 3-knot restricted cubic spline function for TSC (knots located at the 20th, 50th, and 80th percentiles of the distribution of TSC of all former smokers). The variation in EOR per PCS by continuous ICS ( $n$ ) is assessed with 3 different models (models C, D, and E below). The first of those is:

$$\text{OR}(d) = 1 + \beta d \times h(n), \quad (\text{C})$$

where  $h(n)$  has the functional form  $h(n) = \exp(\Phi_1 \ln(n) + \Phi_2 \ln(n)^2)$ .  $\Phi_1$  and  $\Phi_2$  are the parameters for the modifying function of continuous ICS. Model C has been published before (4, 7, 8).

We modified model C to include a flexible spline function for ICS, as shown:

$$\text{OR}(d) = 1 + \beta d \times \exp(g_1(n)). \quad (\text{D})$$

$g_1$  is a 3-knot restricted cubic spline function of continuous ICS ( $n$ ) (knots located at the 20th, 50th, and 80th percentiles of the distribution of ICS of all smokers). Models C and D were fitted to a subset of the data that was restricted to current and never smokers who were 50–75 years of age.

Similar to model B, we extended model D with a function for TSC to allow the inclusion of former smokers in our analysis, as follows:

$$\text{OR}(d) = 1 + \beta d \times \exp(g_1(n) + g_2(t)), \quad (\text{E})$$

where  $g_1$  and  $g_2$  are 3-knot restricted cubic spline functions with knots located at the 20th, 50th, and 80th percentiles of the distribution of TSC of all former smokers.  $g_1$  is a function of continuous ICS ( $n$ ) and  $g_2$  is a function of continuous TSC ( $t$ ).

All models were fitted using the NLMIXED procedure in SAS, version 9.2 (SAS Institute, Inc., Cary, North Carolina). Effects were adjusted for study center, age group (<45, 45–49, 50–54, 55–59, 60–64, 65–69, 70–74, 75–79,  $\geq 80$  years), and sex by allowing for stratum-specific baseline odds. Analyses were also fully stratified by sex and study location and conducted for all lung cancer subtypes combined and for 3 major lung cancer subtypes separately: squamous cell carcinoma, small cell carcinoma, and adenocarcinoma. We assessed the sensitivity of the restricted cubic spline functions for continuous ICS and TSC to alternative knot locations (10th, 50th, and 90th percentiles and 5th, 50th, and 95th percentiles) in an analysis of all lung cancer subtypes combined among men and women. We observed a marginal impact on both model fit (Akaike information criterion) and model prediction. Therefore, all analyses were conducted with the a priori specified knot locations (20th, 50th, and 80th percentiles). Bootstrapped 95% confidence intervals of the functions for ICS and TSC were estimated via 1,000 bootstrap replications

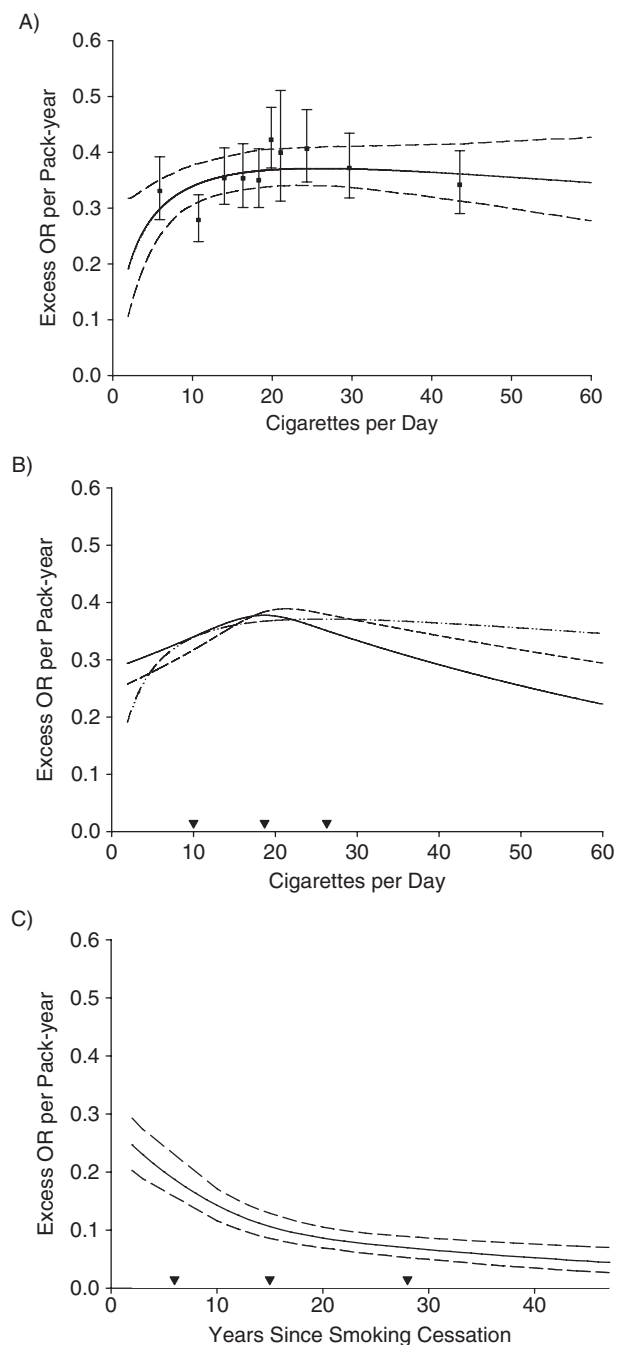

**Figure 1.** Modification of the excess odds ratio (OR) for lung cancer per pack-year of smoking (all subtypes combined), 1985–2009. A) Point estimates and 95% confidence intervals from linear odds ratio models fitted within deciles of smoking intensity (model A) are combined with the effect of function  $h$  from model C. All predictions in A are based on analysis of the data set restricted to current and never smokers aged 50–75 years. B) The effect of function  $h$  from model C (dash dotted line) and the effect of function  $g_1$  from model D (dashed line) are combined with the effect of function  $g_1$  from model E (continuous black line). Model E is fitted on a data set that included former smokers. C) The modification of the excess OR per pack-year of smoking by time since smoking cessation (function  $g_2$  in model E) was shown. Triangles indicate the location of the knots of the restricted cubic splines. Bootstrapped 95% confidence intervals (dashed lines in A and C) are based on 1,000 replications. See text for details on models.

of the original data, and we used the 2.5th and 97.5th percentiles of the resulting distribution. To avoid overinterpretation of patterns for regions in which the data were extremely sparse, we excluded predictions for intensities less than the 1st percentile and higher than the 99th percentile of the distribution of the exposed persons from all plots. The same approach was used for TSC. A likelihood ratio test (18) was used to compare differences in fit with the data between nested models. Because (conditional on attained age) age at smoking initiation 1) is multicollinear with duration of smoking and TSC, 2) typically shows relatively little variation, and 3) is not very strongly associated with cancer occurrence, we did not assess the effect of age at smoking initiation in our analysis (2).

## RESULTS

The pooled data set consisted of 17,975 cases (14,255 men and 3,720 women) and 22,353 controls (17,267 men and 5,086 women). Further details of the study population are provided in Web Table 1.

We first applied models A and C to a data set that was restricted to current and never smokers who were 50–75 years of age. Figure 1A shows the effect of ICS on the lung cancer EOR per PCS, estimated using models A (point estimates for deciles of ICS) and C (continuous line) among current and never smokers (i.e., excluding former smokers). EORs per PCS estimated with model A increased with increasing ICS below 20 cigarettes (1 pack) per day and slightly decreased with increasing ICS at intensities higher than 20 cigarettes per day. The continuous prediction of model C followed the pattern of the point estimates predicted with model A. Importantly, because of model specification, model C would predict EOR = 0 for zero ICS. Parameter estimates for  $\Phi_1$  and  $\Phi_2$  were 0.0258 (standard error, 0.0062) and  $-0.0216$  (standard error, 0.0052), respectively.

Next, we compared the effect of ICS predicted by model C (Figure 1B, gray line) with the effect of ICS predicted by a model that included a flexible spline function for ICS (model D; Figure 1B, dashed line). Knots of the restricted cubic spline were located at 10, 19, and 26 cigarettes per day. A comparison based on the Akaike information criterion (19) suggested that model D (Akaike information criterion = 22,677) had a better fit to the data than did model C (Akaike information criterion = 22,687). For intensities higher than 20 cigarettes per day, model D predicted a slightly stronger decrease in EOR per PCS with increasing ICS than did model C. Furthermore, model D was not restricted to start at EOR/PCS = 0 for zero ICS, which resulted in a less pronounced increase in EOR per PCS with increasing ICS below 20 cigarettes per day.

The continuous black line in Figure 1B is the effect of ICS predicted by a model that was fitted on current, former, and never smokers of all ages and included flexible spline functions for both ICS and TSC (model E). The effect of ICS predicted by model E closely resembled the prediction of model D. The effect of TSC predicted by model E is presented in Figure 1C. Knots of the restricted cubic spline were located at 6, 15, and 28 years since smoking cessation. Model E predicted a strong reduction (83%) in the EOR for lung cancer per PCS with increasing TSC.

In Table 1, we report the fit of model E to the study data. In model  $E_0$ , the functions for ICS and TSC were set to 0; thus, the effect of PCS on the odds ratio for lung cancer was not modified. On the basis of a likelihood ratio test, both model  $E_1$  (in which the effect of TSC on the EOR for lung cancer per PCS was set to 0) and model  $E_2$  (in which the effect of ICS was set to 0) provided a significantly better fit to the data than did model  $E_0$ . Furthermore, model  $E_3$ , in which functions for both ICS and TSC were estimated, provided a significantly better fit to the study data than did models  $E_1$  and  $E_2$ . Model  $E_3$  (hereafter referred to as model E) was therefore selected for further analyses of the data set.

**Table 1.** Linear Odds Ratio Models for Total Cigarette Exposure and 3 Lung Cancer Subtypes Fitted on the SYNERGY Data, 1985–2009<sup>a</sup>

| Model           | Excess OR Modification | $\Delta$ df | Type of Cancer |             |                      |                         |             |                      |                      |             |                      |                |             |                      |
|-----------------|------------------------|-------------|----------------|-------------|----------------------|-------------------------|-------------|----------------------|----------------------|-------------|----------------------|----------------|-------------|----------------------|
|                 |                        |             | Combined       |             |                      | Squamous Cell Carcinoma |             |                      | Small Cell Carcinoma |             |                      | Adenocarcinoma |             |                      |
|                 |                        |             | LL             | $\Delta$ LL | P Value <sup>b</sup> | LL                      | $\Delta$ LL | P Value <sup>b</sup> | LL                   | $\Delta$ LL | P Value <sup>b</sup> | LL             | $\Delta$ LL | P Value <sup>b</sup> |
| $E_0$           | Not modified           |             | 45,828         |             |                      | 25,099                  |             |                      | 14,220               |             |                      | 23,001         |             |                      |
| $E_1$           | ICS                    |             | 45,727         |             |                      | 25,049                  |             |                      | 14,185               |             |                      | 22,901         |             |                      |
| $E_1$ vs. $E_0$ |                        | 2           |                | 101         | <0.0001              |                         | 50          | <0.0001              |                      | 31          | <0.0001              |                | 35          | <0.0001              |
| $E_2$           | TSC                    |             | 44,895         |             |                      | 24,506                  |             |                      | 13,698               |             |                      | 22,786         |             |                      |
| $E_2$ vs. $E_0$ |                        | 2           |                | 933         | <0.0001              |                         | 593         | <0.0001              |                      | 518         | <0.0001              |                | 522         | <0.0001              |
| $E_3$           | ICS and TSC            |             | 44,843         |             |                      | 24,487                  |             |                      | 13,686               |             |                      | 22,714         |             |                      |
| $E_3$ vs. $E_0$ |                        | 4           |                | 985         | <0.0001              |                         | 612         | <0.0001              |                      | 526         | <0.0001              |                | 534         | <0.0001              |
| $E_3$ vs. $E_1$ |                        | 2           |                | 884         | <0.0001              |                         | 562         | <0.0001              |                      | 495         | <0.0001              |                | 499         | <0.0001              |
| $E_3$ vs. $E_2$ |                        | 2           |                | 52          | <0.0001              |                         | 19          | 0.0001               |                      | 8           | 0.0025               |                | 12          | <0.0001              |

Abbreviations: df, degrees of freedom for likelihood ratio test; ICS, intensity of cigarette smoke; LL, log likelihood estimate of the fitted model; OR, odds ratio; TSC, time since smoking cessation.

<sup>a</sup> Excess OR was modified by either a function for the intensity of exposure ( $E_1$ ), a function for the time since smoking cessation ( $E_2$ ), or both ( $E_3$ ).

<sup>b</sup> P values from likelihood ratio tests.

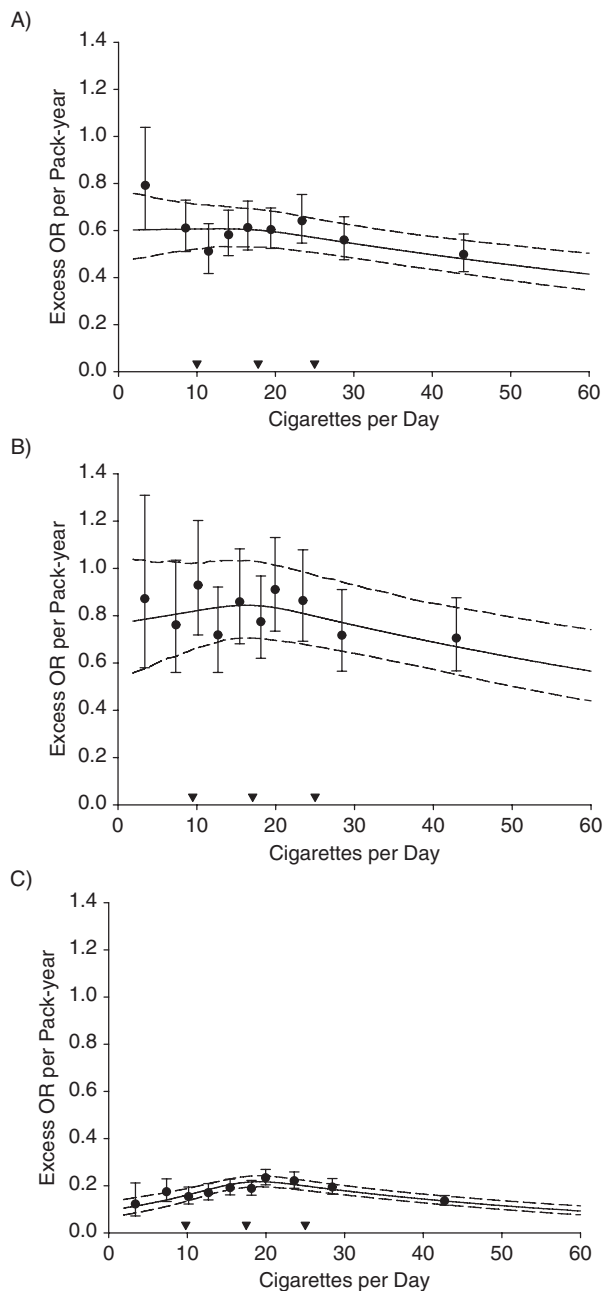

**Figure 2.** Modification of the excess odds ratio (OR) for squamous cell carcinoma (A), small cell carcinoma (B), and adenocarcinoma (C) per pack-year of smoking by smoking intensity, 1985–2009. The continuous line is the prediction from function  $g_1$  of model E. Triangles indicate the location of the knots of the restricted cubic splines. Bootstrapped 95% confidence intervals (dashed lines) are based on 1,000 replications. Point estimates and associated 95% confidence intervals are from linear odds ratio models fitted within categories of smoking intensity are from model B. See text for details on models.

Similar patterns with ICS were observed in analyses for 3 major subtypes of cancer: squamous cell carcinoma, small cell carcinoma, and adenocarcinoma (Figure 2). Analyses of men and women separately resulted in patterns of the

EOR per PCS that were comparable to the analyses of men and women combined (Web Figure 2).

In Figure 3, we show study-specific patterns of the modification of EOR per PCS by ICS. These analyses were conducted on all subtypes combined. Predictions were generated by applying model E to each individual study.

Wide confidence intervals in some of the panels of Figure 3 demonstrate that some studies had limited statistical power to explore patterns in the EOR per PCS. Furthermore, model E did not converge when applied a lung cancer study in France, a lung cancer study in Paris, and the Monitoring van Risicofactoren en Gezondheid in Nederland (MORGEN) study, which were 3 studies of modest sample size (Web Table 1). In most studies for which we were able to observe a pattern, a downward trend in EOR per PCS with increasing ICS was observed after reaching a maximum EOR per PCS for approximately 20–30 cigarettes per day. Exceptions were the Liverpool Lung Project (LLP), the Lungcancer i Stockholm (LUCAS) Study, and the Polish arm of the International Agency for Research on Cancer Multicenter Case-Control Study of Occupational, Environment and Lung Cancer in Central and Eastern Europe (INCO-COPERNICUS), which showed a flat or increasing in EOR per PCS. Confidence intervals for the predicted patterns for these studies did not exclude a downward trend. Higher uncertainty within studies and less consistency across studies was observed for patterns in effect modification by ICS for smoking intensities below 20 cigarettes per day. Among studies for which predictions were relatively precise, upward patterns were generally observed. Absolute levels of the EOR per PCS varied considerably across study locations.

## DISCUSSION

Application of our approach in the SYNERGY data set provided insight into the consistency of patterns of modification of the effect of PCS on the EOR for lung cancer by ICS across a large number of independently designed case-control studies from Central and Eastern Europe, Canada, and New Zealand. We observed negative effect modification of the association of PCS and lung cancer by ICS for persons who smoked more than 20–30 cigarettes per day. Patterns of effect modification were similar across the major cancer subtypes of squamous cell carcinoma, small cell carcinoma, and adenocarcinoma. These findings corroborate the results from analyses conducted on other data sets of smoking and lung cancer (4, 7, 8). Our analysis furthers existing knowledge by showing similar patterns of effect modification across a large number of independently designed studies by allowing for and demonstrating strong effect modification by TSC and by including semiparametric spline functions that allow for flexible assessment of patterns of effect modification.

### Intensity of cigarette smoking

The observed variation in the EOR per PCS with increasing ICS might be the result of biological processes, such as saturation of metabolism or increasing DNA repair capacity with increasing ICS (4, 20). Increasing misclassification of ICS with increasing ICS could also have contributed to the

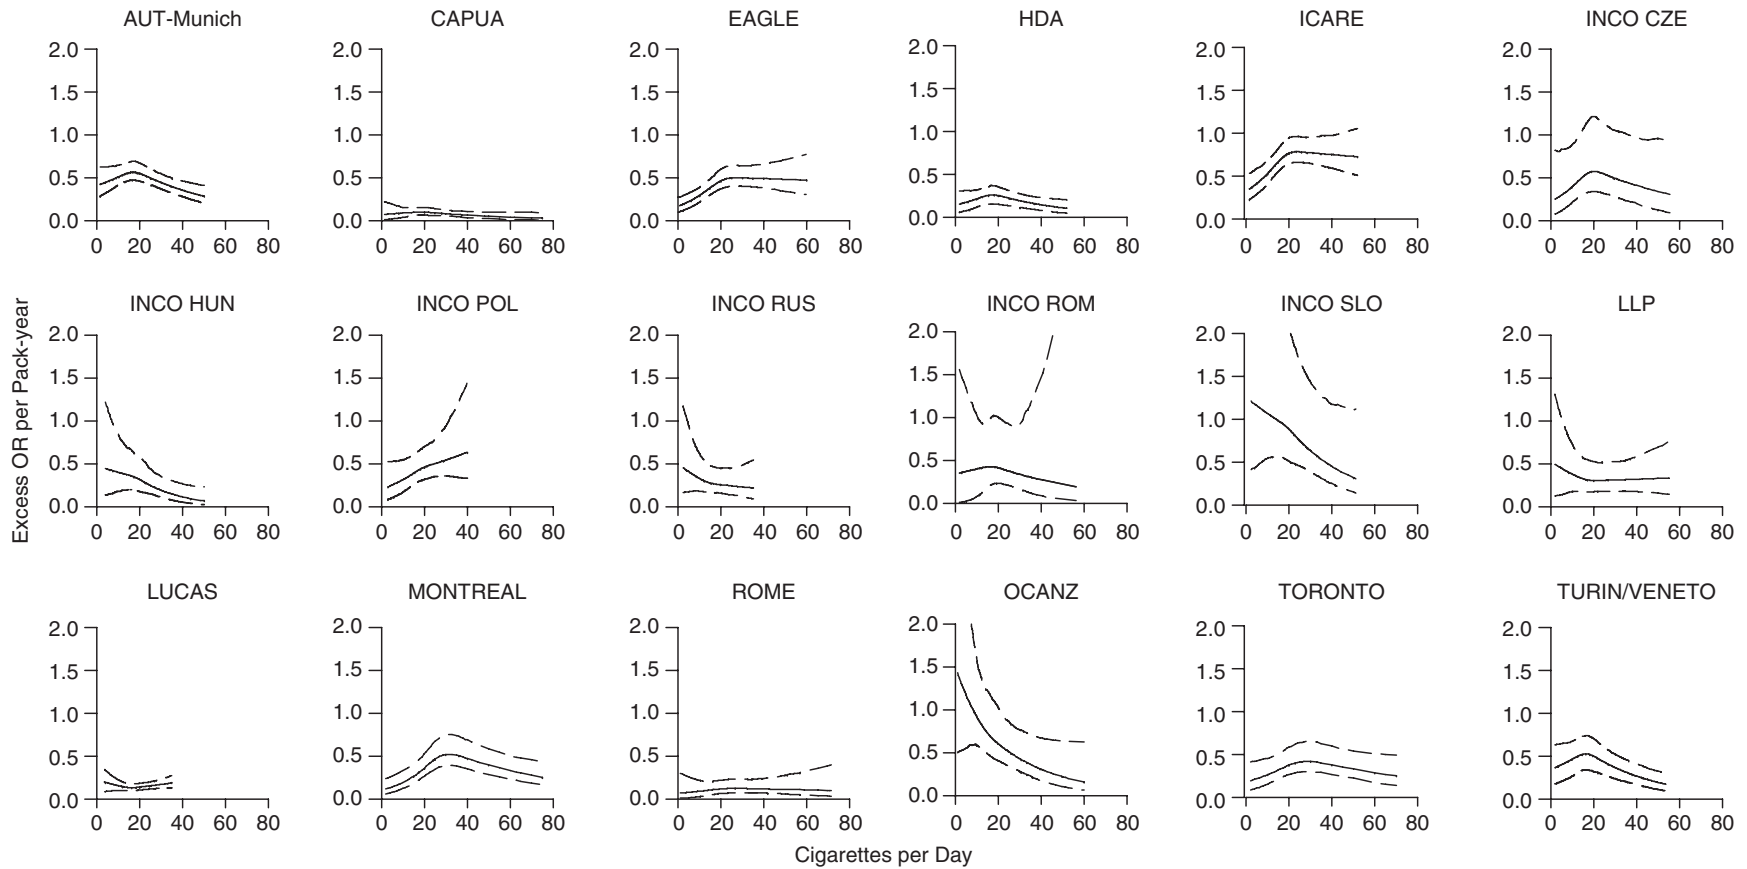

**Figure 3.** Modification of the excess odds ratio (OR) for lung cancer (all subtypes combined) per pack-year of smoking by smoking intensity, stratified by study location, 1985–2009. Plots show the effect of function  $g_1$  from model E. Bootstrapped 95% confidence intervals (dashed lines) are based on 1,000 replications. Study details are described in Web Table 1. Predictions for the lung cancer study in France, lung cancer study in Paris, and Monitoring van Risicofactoren en Gezondheid in Nederland Study are not shown because of lack of model convergence. See text for details about the models. AUT-Munich, Arbeit und Technik, Munich; CAPUA, Cancer de Pulmon en Asturias; EAGLE, Environment and Genetics in Lung Cancer Etiology; HDA, Humanisierung des Arbeitslebens; ICARE, Investigations Cancers Respiratoires et Environnement; INCO CZE, International Agency for Research on Cancer Multicenter Case-Control Study of Occupational, Environment and Lung Cancer in Central and Eastern Europe (INCO-COPERNICUS) in the Czech Republic; INCO HUN, INCO-COPERNICUS in Hungary; INCO POL, INCO-COPERNICUS in Poland; INCO RUS, INCO-COPERNICUS in Russia; INCO ROM, INCO-COPERNICUS in Romania; INCO SLO, INCO-COPERNICUS in Slovakia; LLP, Liverpool Lung Project; LUCAS, Lung-cancer i Stockholm; MONTREAL, Montreal case-control study of environmental causes of lung cancer; OCANZ, Occupational Cancer in New Zealand; ROME, case-control study of lung cancer in Rome; TORONTO, Toronto lung cancer (case-control) study; TURIN/VENETO, population-based case-control study of lung cancer in the city of Turin and in the eastern part of the Veneto region.

observed patterns. Studies of cigarette smoking and nicotine dependency have shown that an increase in the number of cigarettes smoked per day might be associated with reduced inhalation per cigarette, and increasing misclassification in the reporting of the number of cigarettes smoked per day itself with increasing ICS is also conceivable (4, 21). Studies using serum or urine cotinine levels as a marker of tobacco smoking intensity have found that lung cancer risks do not plateau at high exposure levels, which suggests that such patterns observed in studies using smoking behavior questionnaires were likely due to exposure misclassification (22, 23). However, cotinine levels only reflect smoking intensity over the past few days and should therefore not be considered as an “ideal” marker to estimate lifelong average smoking intensity (24). Our results suggest that the ICS patterns predicted for the low exposure range by our model E (which is not constrained to start at  $\beta = 0$  at no exposure) are highly variable in magnitude and direction across study locations. This is likely explained by the limited range of PCS at lower exposure intensities (4).

We observed considerable variation across studies in the range of predicted EORs per PCS. The large heterogeneity of results might be associated with factors inherent to the studies, like design, response rates, and statistical power (25). Differential distribution of the relative occurrence of lung cancer subtypes, characteristics of smoking habits, and confounders and effect modifiers such as occupational exposures, indoor radon exposure and dietary components across study populations likely also played a role (14, 25).

### Time since smoking cessation

Our finding of a continuous decrease in the EOR per PCS with TSC corroborates findings from other studies. For example, Peto et al. (15) demonstrated that the ratio of lung cancer in former smokers compared with current smokers fell sharply with increasing TSC. Our analysis demonstrates that this effect remains after adjustment for PCS. Similar patterns with time since exposure cessation have been observed for exposure to benzene and leukemia (26) and for exposure to radon and lung cancer (27).

### Extension to other (time-varying) exposures

Through its flexible parameterization, our model can accommodate various patterns of effect modification and is therefore a suitable tool to explore effect modification by intensity of exposure for a wide range of different exposures. Similar models have successfully been applied in studies of arsenic, as well as alcohol and smoking and a range of cancers (6, 9, 10). A limitation of these models (including ours) is that they ignore the possible variation in the EOR due to variation in exposure intensity over time. Using the general framework described in the Web Appendix as starting point, our model can be extended to accommodate information on time-varying exposure. Richardson et al. recently provided an example of such a model in a study of radon exposure and lung cancer (28). A further extension is to allow for more complicated patterns of effect modification by including

tensor product splines as done by Berhane et al. (29), although these may come at the cost of reduced interpretability.

Our model and possible further extensions of it provide insight into whether the use of cumulative exposure in an epidemiologic analysis is justified or whether reducing complex exposure history to a metric such as cumulative exposure is overly restrictive. Combining information on observed patterns of effect modification with mechanistic insights might contribute to the incorporation of biological hypotheses in the development of more biologically relevant exposure metrics (30).

### ACKNOWLEDGMENTS

Author affiliations: International Agency for Research on Cancer, Lyon, France (Jelle Vlaanderen, Joachim Schüz, Ann Olsson, Kurt Straif); Institute for Risk Assessment Sciences, Utrecht, the Netherlands (Jelle Vlaanderen, Lützen Portengen, Hans Kromhout, Roel Vermeulen); The Institute of Environmental Medicine, Karolinska Institutet, Stockholm, Sweden (Ann Olsson, Per Gustavsson, Nils Plato); Institute for Prevention and Occupational Medicine of the German Social Accident Insurance—Institute of the Ruhr-Universität Bochum, Bochum, Germany (Beate Pesch, Benjamin Kendzia, Thomas Brüning); Inserm, Centre for Research in Epidemiology and Population Health (CESP), U1018, Environmental Epidemiology of Cancer Team, Villejuif, France (Isabelle Stücker, Florence Guida); Université Paris-Sud, Unité mixte de recherche en santé (UMRS) 1018, Villejuif, France (Isabelle Stücker, Florence Guida); Institut für Epidemiologie I, Deutsches Forschungszentrum für Gesundheit und Umwelt, Neuherberg, Germany (Irene Brüske, Heinz-Erich Wichmann); Unit of Epidemiology, Fondazione Istituto Di Ricovero e Cura a Carattere Scientifico (IRCCS) CàGranda—Ospedale Maggiore Policlinico, Milan, Italy (Dario Consonni); National Cancer Institute, Bethesda, Maryland (Maria Teresa Landi, Neil Caporaso); University of Montréal Hospital Research Center, Montreal, Canada (Jack Siemiatycki); Cancer Epidemiology Unit, Department of Medical Sciences, University of Turin, Turin, Italy (Franco Merletti, Dario Mirabelli, Lorenzo Richiardi); Institute for Medical Informatics, Biometry and Epidemiology, University of Duisburg-Essen, Essen, Germany (Karl-Heinz Jöckel); Bremen Institute for Prevention Research and Social Medicine, Bremen, Germany (Wolfgang Ahrens, Hermann Pohlabein); The Biomedical Research Centre Network for Epidemiology and Public Health (CIBERESP), University of Oviedo, Oviedo, Spain (Adonina Tardón); Russian Cancer Research Centre, Moscow, Russia (David Zaridze); Roy Castle Lung Cancer Research Programme, Department of Molecular and Clinical Cancer Medicine, Cancer Research Centre, University of Liverpool, Liverpool, United Kingdom (John K. Field); Centre for Public Health Research, Massey University, Wellington, New Zealand (Andrea ‘t Mannelte, Neil Pearce); Occupational Cancer Research Centre, Toronto, Canada (John McLaughlin, Paul Demers); The Nofer Institute of Occupational Medicine, Lodz, Poland (Neonila Szeszenia-Dabrowska); The M Skłodowska-Curie

Cancer Center and Institute of Oncology, Warsaw, Poland (Jolanta Lissowska); National Institute of Environment Health, Budapest, Hungary (Peter Rudnai); Regional Authority of Public Health, Banska Bystrica, Slovakia (Eleonora Fabianova); Institute of Public Health, Bucharest, Romania (Rodica Stanescu Dumitru); Institute of Hygiene and Epidemiology, 1st Faculty of Medicine, Charles University, Prague, Czech Republic (Vladimir Bencko); Masaryk Memorial Cancer Institute, Brno, Czech Republic (Lenka Foretova); Palacky University, Faculty of Medicine, Olomouc, Czech Republic (Vladimir Janout); The Tisch Cancer Institute, Mount Sinai School of Medicine, New York, New York (Paolo Boffetta); International Prevention Research Institute, Lyon, France (Paolo Boffetta); Department of Epidemiology, ASL RomaE, Rome, Italy (Francesco Forastiere); The National Institute for Public Health and Environmental Protection (RIVM), Bilthoven, the Netherlands (Bas Bueno-de-Mesquita); and Western Australia Institute for Medical Research, Perth, Australia (Susan Peters).

The SYNERGY project is funded by the German Social Accident Insurance. The case-control study of environmental causes of lung cancer in Montreal was supported by the Canadian Institutes for Health Research and Guzzo-SRC Chair in Environment and Cancer. The Toronto study was funded by the National Cancer Institute of Canada, with funds provided by the Canadian Cancer Society, and the occupational analysis was conducted by the Occupational Cancer Research Centre, which was supported by the Workplace Safety and Insurance Board, the Canadian Cancer Society, and Cancer Care Ontario. The Investigations Cancers Respiratoires et Environnement study was supported by the French Agency of Health Security, the Fondation de France, the French National Research Agency, the National Institute of Cancer, the Fondation for Medical Research, The French Institute for Public Health Surveillance, The Health Ministry, the Organization for the Research on Cancer, and the French Ministry of Work, Solidarity and Public Function. The lung cancer study in France was supported by the Fondation de France. The Paris lung cancer study was funded by Organization for the Research on Cancer. The Arbeit und Technik Study in Germany was funded by Federal Ministry of Education, Science, Research, and Technology grant 01 HK 173/0. The Humanisierung des Arbeitslebens Study was funded by the Federal Ministry of Science (grant 01 HK 546/8) and the Ministry of Labour and Social Affairs (grant IIIb7-27/13). The International Agency for Research on Cancer Multicenter Case-Control Study of Occupational, Environment and Lung Cancer in Central and Eastern Europe (INCO-COPERNICUS) was supported by a grant from the European Commission's INCO-COPERNICUS program (contract IC15-CT96-0313). In Warsaw, the study was supported by grant SPUB-M-COPERNICUS/P-05/DZ-30/99/2000 from the Polish State Committee for Scientific Research. In Liverpool, the work was funded by the Roy Castle Foundation as part of the Liverpool Lung Project. The Environment and Genetics in Lung Cancer Etiology Study was funded by the Intramural Research Program of the National Institutes of Health, National Cancer Institute, Division of Cancer Epidemiology and Genetics, Bethesda, Maryland; the Environmental Epidemiology Program of the Lombardy

Region, Italy; and the Istituto Nazionale per l'Assicurazione contro gli Infortuni sul Lavoro, Rome, Italy. The population-based case-control study of lung cancer in the city of Turin was supported by the Italian Association for Cancer Research, Region Piedmont, Compagnia di San Paolo. The study in Rome was conducted with a partial support from the European Union Nuclear Fission Safety Program (grant F14P-CT96-0055) and the Lazio Region. The Monitoring van Risicofactoren en Gezondheid in Nederland Study was supported by the Dutch Ministry of Health, Welfare & Sports, National Institute of Public Health & the Environment, and the Europe Against Cancer Program. The Cancer de Pulmon en Asturias Study was supported by the Instituto Universitario de Oncologia, Universidad de Oviedo, Asturias, the Fondo de Investigacion Sanitaria, and the Ciber de Epidemiologia y Salud Publica, Spain. The Lungcancer I Stockholm Study was supported by the Swedish Council for Work Life Research and the Swedish Environmental Protection Agency. The Occupational Cancer in New Zealand Study was funded by the Health Research Council of New Zealand, the New Zealand Department of Labour, Lottery Health Research, and the Cancer Society of New Zealand.

Part of the work reported in this article was undertaken during the tenure of a Postdoctoral Fellowship from the International Agency for Research on Cancer, partially supported by the European commission FP7 Marie Curie Actions – People – Cofunding of regional, national, and international programmes (COFUND).

We thank Veronique Luzon at International Agency for Research on Cancer for pooling and managing the data.

Conflict of interest: none declared.

## REFERENCES

1. Smith TJ. Occupational exposure and dose over time: limitations of cumulative exposure. *Am J Ind Med.* 1992;21(1):35–51.
2. Leffondré K, Abrahamowicz M, Siemiatycki J, et al. Modeling smoking history: a comparison of different approaches. *Am J Epidemiol.* 2002;156(9):813–823.
3. Doll R, Peto R. Cigarette smoking and bronchial carcinoma: dose and time relationships among regular smokers and lifelong non-smokers. *J Epidemiol Community Health.* 1978;32(4):303–313.
4. Lubin JH, Caporaso NE. Cigarette smoking and lung cancer: modeling total exposure and intensity. *Cancer Epidemiol Biomarkers Prev.* 2006;15(3):517–523.
5. Furukawa K, Preston DL, Lönn S, et al. Radiation and smoking effects on lung cancer incidence among atomic bomb survivors. *Radiat Res.* 2010;174(1):72–82.
6. Lubin JH, Moore LE, Fraumeni JF, et al. Respiratory cancer and inhaled inorganic arsenic in copper smelters workers: a linear relationship with cumulative exposure that increases with concentration. *Environ Health Perspect.* 2008;116(12):1661–1665.
7. Lubin JH, Alavanja MCR, Caporaso N, et al. Cigarette smoking and cancer risk: modeling total exposure and intensity. *Am J Epidemiol.* 2007;166(4):479–489.
8. Lubin JH, Caporaso N, Wichmann HE, et al. Cigarette smoking and lung cancer: modeling effect modification of total exposure and intensity. *Epidemiology.* 2007;18(5):639–648.



9. Lubin JH, Cook MB, Pandeya N, et al. The importance of exposure rate on odds ratios by cigarette smoking and alcohol consumption for esophageal adenocarcinoma and squamous cell carcinoma in the Barrett's Esophagus and Esophageal Adenocarcinoma Consortium. *Cancer Epidemiol*. 2012;36(3):306–316.
10. Lubin JH, Purdue M, Kelsey K, et al. Total exposure and exposure rate effects for alcohol and smoking and risk of head and neck cancer: a pooled analysis of case-control studies. *Am J Epidemiol*. 2009;170(8):937–947.
11. Richardson DB. A simple approach for fitting linear relative rate models in SAS. *Am J Epidemiol*. 2008;168(11):1333–1338.
12. Olsson AC, Gustavsson P, Kromhout H, et al. Exposure to diesel motor exhaust and lung cancer risk in a pooled analysis from case-control studies in Europe and Canada. *Am J Respir Crit Care Med*. 2011;183(7):941–948.
13. Peters S, Vermeulen R, Olsson A, et al. Development of an exposure measurement database on five lung carcinogens (ExpoSYN) for quantitative retrospective occupational exposure assessment. *Ann Occup Hyg*. 2012;56(1):70–79.
14. Pesch B, Kendzia B, Gustavsson P, et al. Cigarette smoking and lung cancer-relative risk estimates for the major histological types from a pooled analysis of case-control studies. *Int J Cancer*. 2012;131(5):1210–1219.
15. Peto R, Darby S, Deo H, et al. Smoking, smoking cessation, and lung cancer in the UK since 1950: combination of national statistics with two case-control studies. *BMJ*. 2000;321(7257):323–329.
16. Lissowska J, Bardin-Mikolajczak A, Fletcher T, et al. Lung cancer and indoor pollution from heating and cooking with solid fuels: the IARC international multicentre case-control study in Eastern/Central Europe and the United Kingdom. *Am J Epidemiol*. 2005;162(4):326–333.
17. Thomas D. *Statistical Methods in Environmental Epidemiology*. New York, NY: Oxford University Press; 2009.
18. Cox D, Hinkley D. *Theoretical Statistics*. London, UK: Chapman and Hall; 1974.
19. Akaike H. A new look at the statistical model identification. *IEEE Trans Automat Contr*. 1974;19(6):716–723.
20. Vineis P, Kogevinas M, Simonato L, et al. Levelling-off of the risk of lung and bladder cancer in heavy smokers: an analysis based on multicentric case-control studies and a metabolic interpretation. *Mutat Res*. 2000;463(1):103–110.
21. Patterson F, Benowitz N, Shields P, et al. Individual differences in nicotine intake per cigarette. *Cancer Epidemiol Biomarkers Prev*. 2003;12(5):468–471.
22. Boffetta P, Clark S, Shen M, et al. Serum cotinine level as predictor of lung cancer risk. *Cancer Epidemiol Biomarkers Prev*. 2006;15(6):1184–1188.
23. Timofeeva MN, McKay JD, Smith GD, et al. Genetic polymorphisms in 15q25 and 19q13 loci, cotinine levels, and risk of lung cancer in EPIC. *Cancer Epidemiol Biomarkers Prev*. 2011;20(10):2250–2261.
24. Spitz MR, Amos CI, Bierut LJ, et al. Cotinine conundrum—a step forward but questions remain. *J Natl Cancer Inst*. 2012;104(10):720–722.
25. Simonato L, Agudo A, Ahrens W, et al. Lung cancer and cigarette smoking in Europe: an update of risk estimates and an assessment of inter-country heterogeneity. *Int J Cancer*. 2001;91(6):876–887.
26. Richardson DB. Temporal variation in the association between benzene and leukemia mortality. *Environ Health Perspect*. 2008;116(3):370–374.
27. Hornung RW, Deddens J, Roscoe R. Modifiers of exposure-response estimates for lung cancer among miners exposed to radon progeny. *Environ Health Perspect*. 1995;103(suppl):49–53.
28. Richardson DB, Cole SR, Langholz B. Regression models for the effects of exposure rate and cumulative exposure. *Epidemiology*. 2012;23(6):892–899.
29. Berhane K, Hauptmann M, Langholz B. Using tensor product splines in modeling exposure-time-response relationships: application to the Colorado Plateau Uranium Miners cohort. *Stat Med*. 2008;27(26):5484–5496.
30. Smith TJ, Kriebel D. *A Biologic Approach to Environmental Assessment and Epidemiology*. Oxford, UK: Oxford University Press; 2010.
